# Supplementary material for: Syntheses, crystal structures and photophysical properties of Cu(ii) complexes: fine tuning of a coordination sphere for selective binding of azamethiphos
Source: Royal Society of Chemistry journal article supplement (doi:10.1039/c6dt04039j), 2016-12-24
Supplement: c6dt04039j1.pdf [file c6dt04039j1.pdf]

## Supporting information

### **Syntheses, crystal structures and photophysical properties of Cu(II) complexes: Fine tuning of coordination sphere for selective binding of Azamethiphos.**

Pushap Raj<sup>a</sup>, Amanpreet Singh<sup>a</sup>, AjneshSingh<sup>b</sup>, Narinder Singh<sup>a,\*</sup>

<sup>a</sup>Department of Chemistry, Indian Institute Technology Ropar, Punjab, 140001, India.

<sup>b</sup>Department of Applied Sciences and Humanities, Jawaharlal Nehru Govt. Engineering College, Sundernagar, Mandi(H.P.)-175018, India.

*\*Corresponding author (Narinder Singh) E-mail: nsingh@iitrpr.ac.in; Tel: +91-1881242176*

#### **Table of Content:**

**Figure S1.** <sup>1</sup>H NMR spectrum of ligand L1

**Figure S2.** <sup>13</sup>C NMR spectrum of ligand L1

**Figure S3.** <sup>1</sup>H NMR spectrum of ligand L2

**Figure S4.** <sup>13</sup>C NMR spectrum of ligand L2

**Figure S5.** FTIR Spectrum of ligand L1

**Figure S6.** FTIR Spectrum of ligand L2

**Figure S7.** ESI-mass spectrum of ligand L1

**Figure S8.** ESI-mass spectrum of ligand L2

**Figure S9.** FTIR Spectrum of complex C1

**Figure S10.** FTIR Spectrum of complex C2

**Figure S11 (A):** The powder XRD pattern of C1 (simulated from single crystal data and synthesized in bulk), (B) The powder XRD pattern of C2 (simulated from single crystal data and synthesized in bulk).

**Figure S12:** The solid state emission spectrum of C1 and C2 (bulk synthesis).

**Figure S13.** The emission spectrum of C2 (10  $\mu\text{M}$ ) in presence of tested organophosphate (30 $\mu\text{M}$ )

**Figure S14.** Jobs plot of C1 in presence of azamethiphos.

**Figure S15.**  $^{31}\text{P}$  NMR spectrum of Azamethiphos and copper complex of Azamethiphos in DMSO- $\text{d}_6$ .

**Figure S16.** The ESI-Mass spectrum of copper: azamethiphos complex.

**Figure S17.** The change in the emission spectrum on addition of  $\text{Cu}^{2+}$  ion (0-10  $\mu\text{M}$ ) in C1: azamethiphos solution.

**Figure S18.** Reversible switching cycles of fluorescence intensity ( $\lambda_{\text{em}} = 430 \text{ nm}$ ) by alternate addition of azamethiphos and copper ion

**Table S1.** Selected bond lengths and angles ( $\text{\AA}$ ,  $^\circ$ ) for C1

**Table S2.** Hydrogen bonding parameters ( $\text{\AA}$ ,  $^\circ$ ) of C1

**Table S3.** Selected bond lengths and angles ( $\text{\AA}$ ,  $^\circ$ ) for C2

**Table S4.** Hydrogen bonding parameters ( $\text{\AA}$ ,  $^\circ$ ) of C2

**Table S5.** Comparisons table between literatures reported sensors and present sensor of organophosphates.

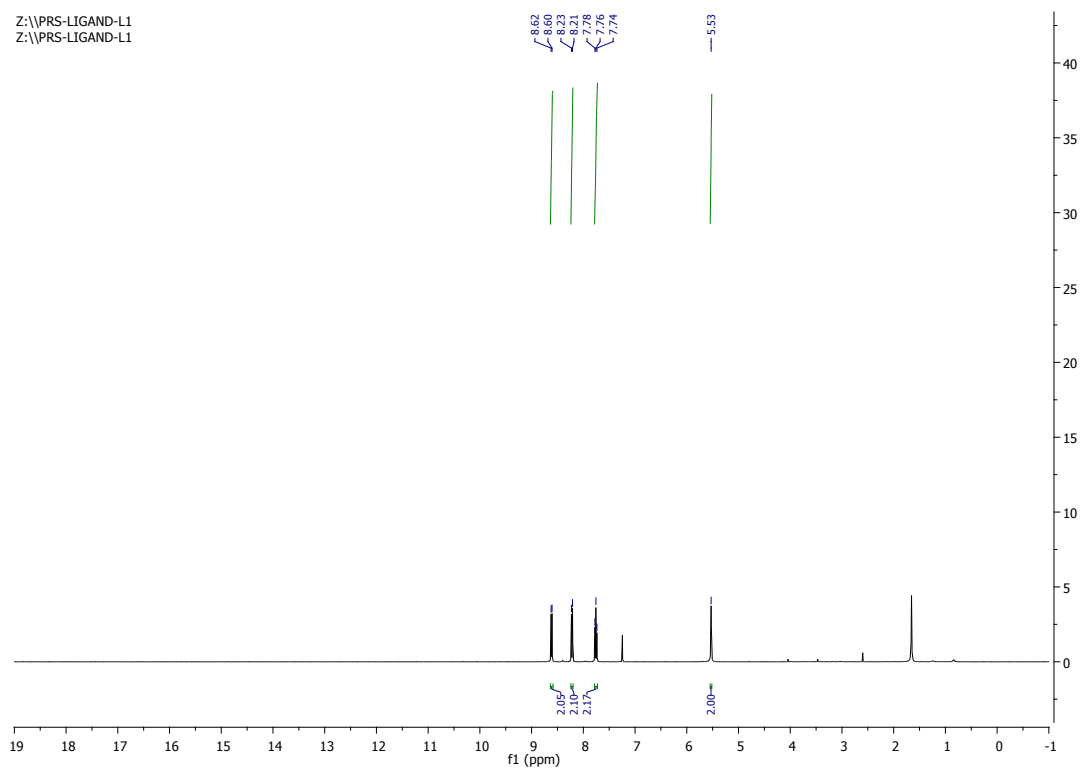

**Figure S1.**  $^1\text{H}$  NMR spectrum of ligand **L1** in  $\text{CDCl}_3$

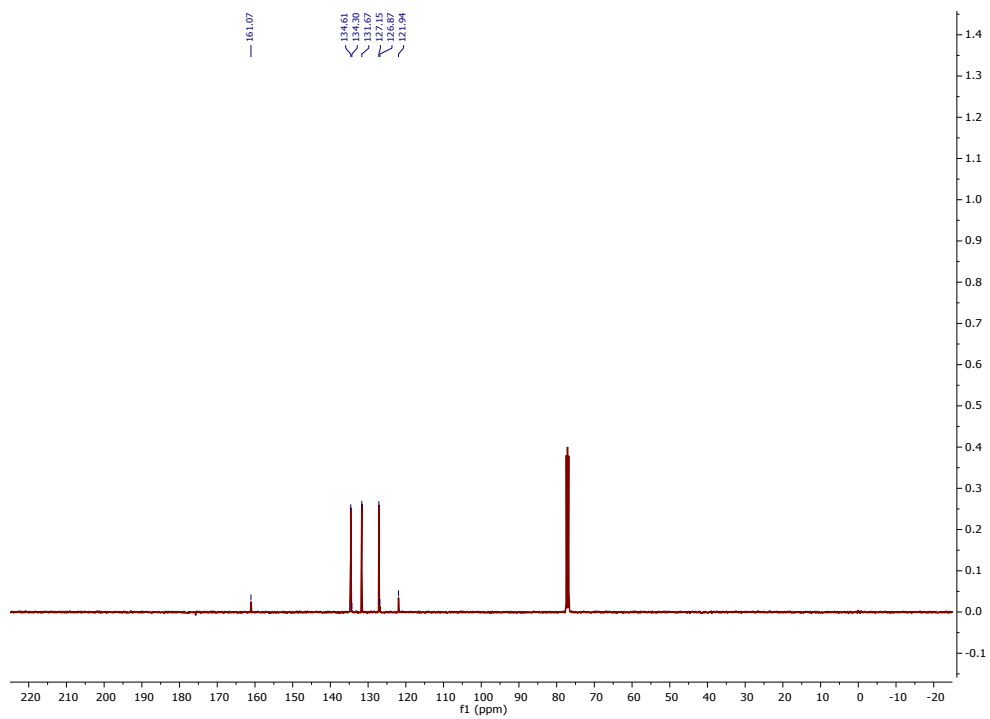

**Figure S2.** <sup>13</sup>C NMR spectrum of ligand L1 in CDCl<sub>3</sub>

Z:\PRS-LIGAND-L2  
Z:\PRS-LIGAND-L2

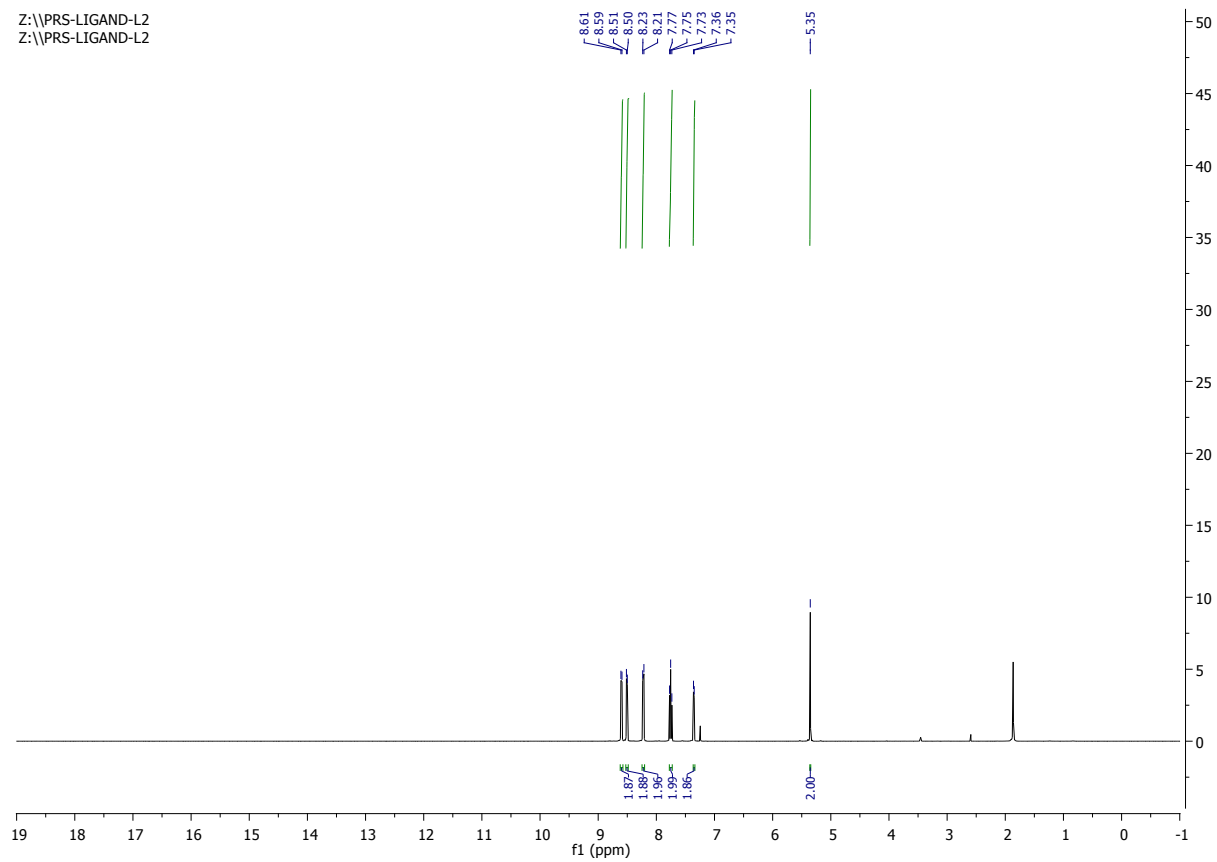

**Figure S3.**  $^1\text{H}$  NMR spectrum of ligand L2 in  $\text{CDCl}_3$

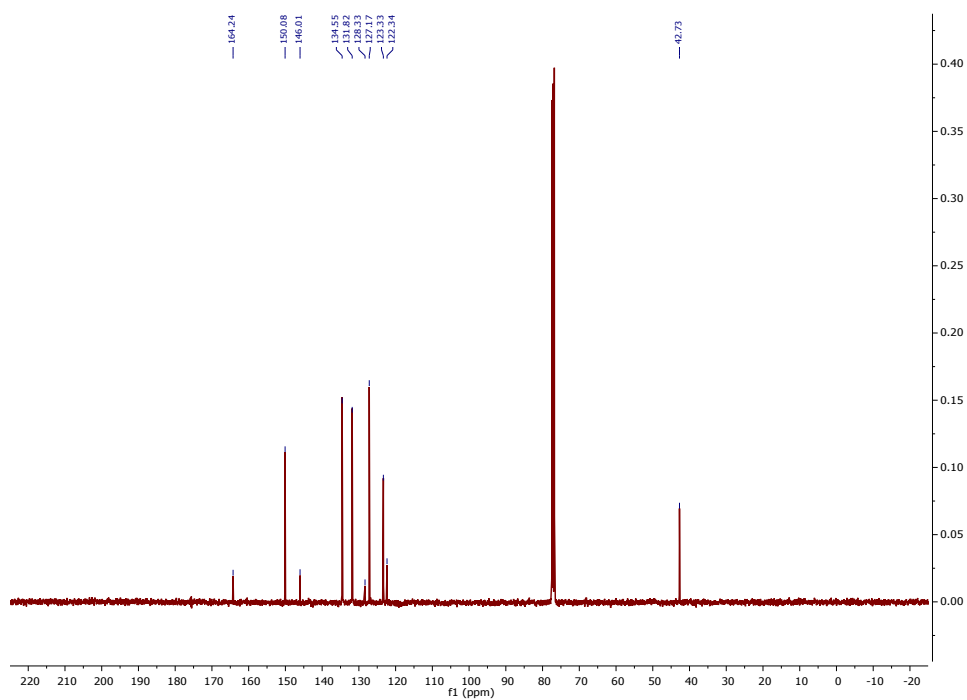

**Figure S4.**  $^{13}\text{C}$  NMR spectrum of ligand L2 in  $\text{CDCl}_3$

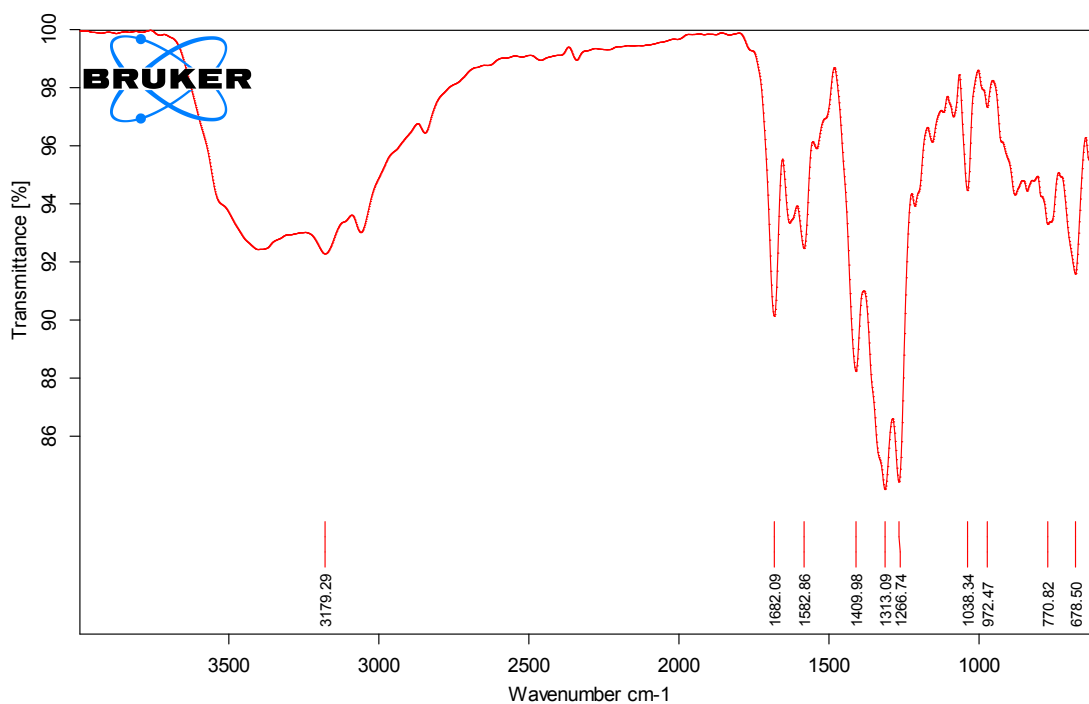

**Figure S5.** FTIR Spectrum of ligand L1

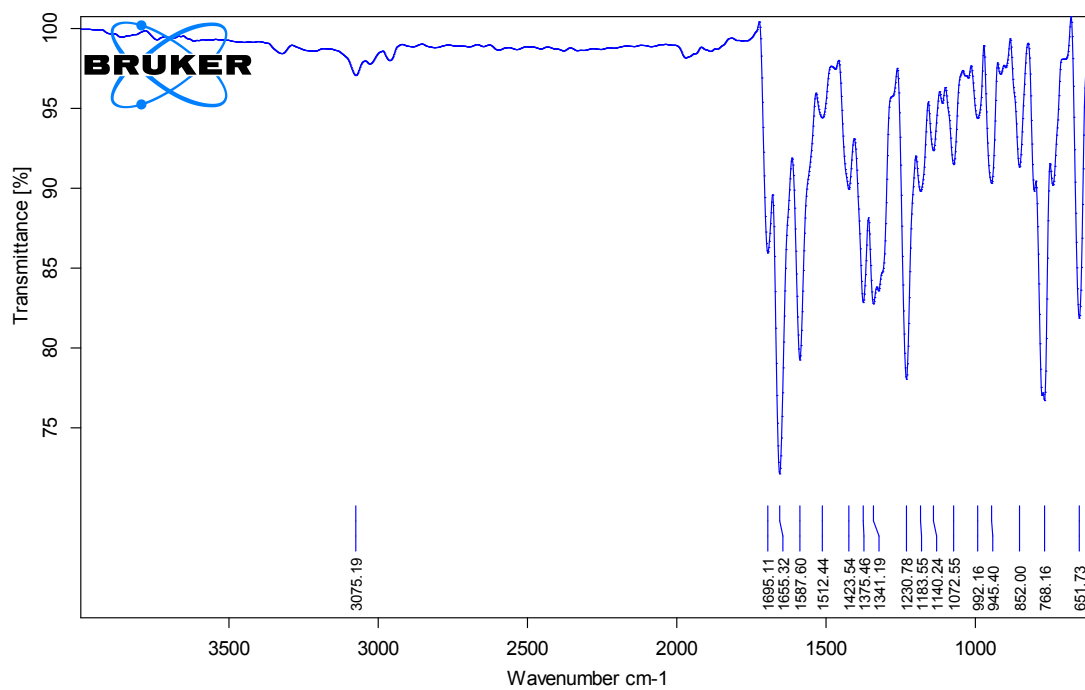

**Figure S6.** FTIR Spectrum of ligand L2

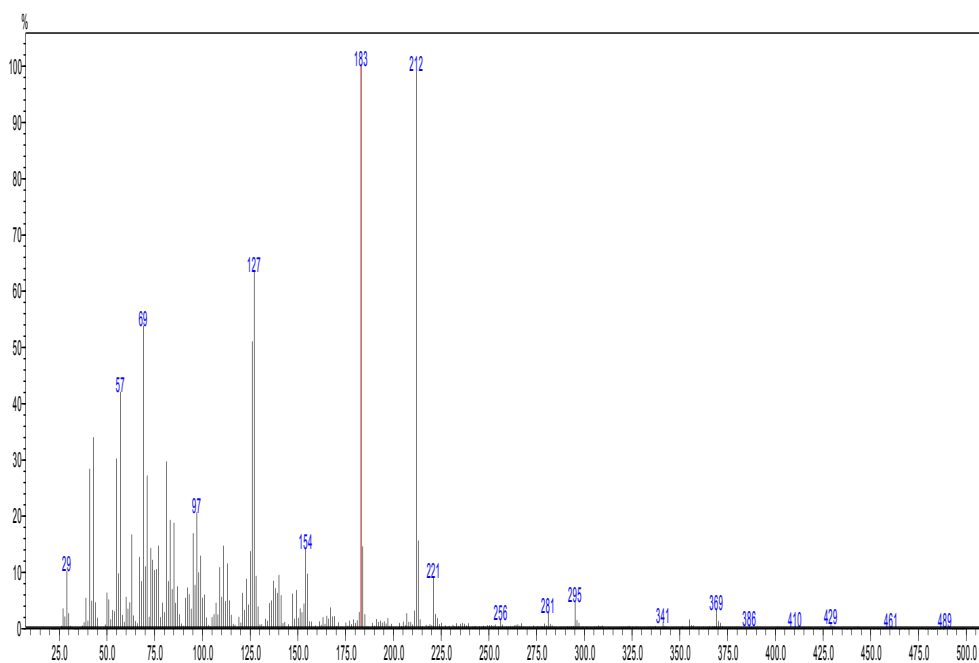

**Figure S7.** ESI-mass spectrum of ligand L1

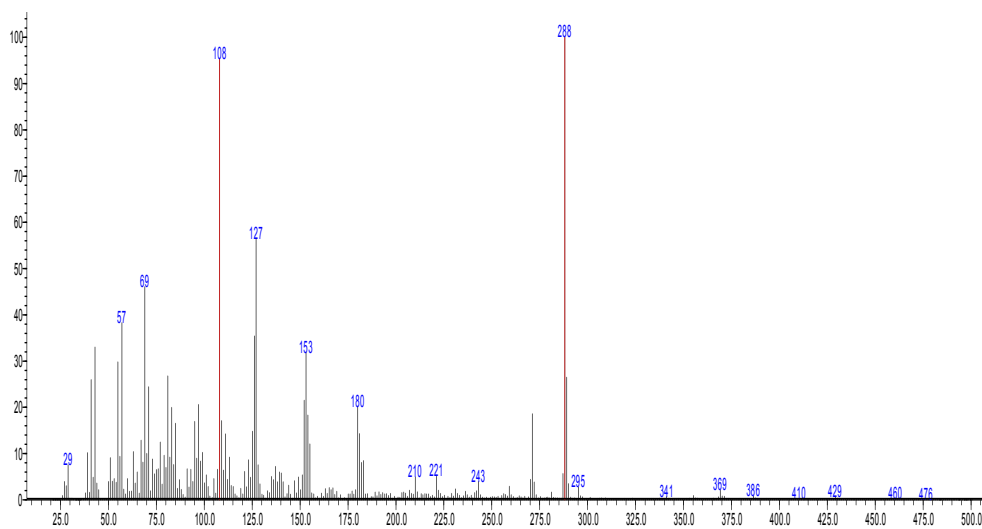

**Figure S8.** ESI-mass spectrum of ligand L2

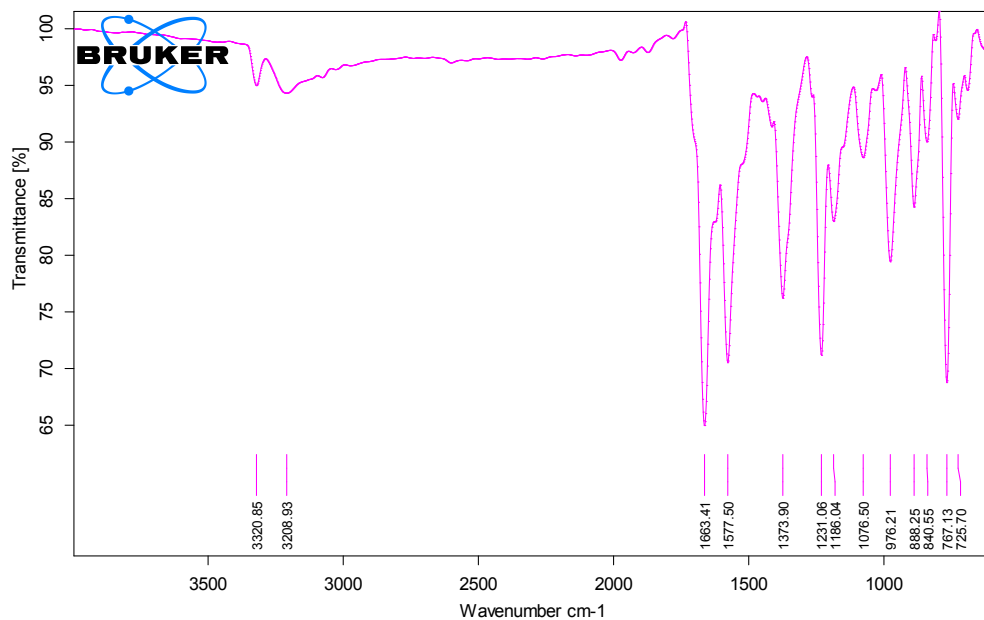

**Figure S9.** FTIR Spectrum of complex C1

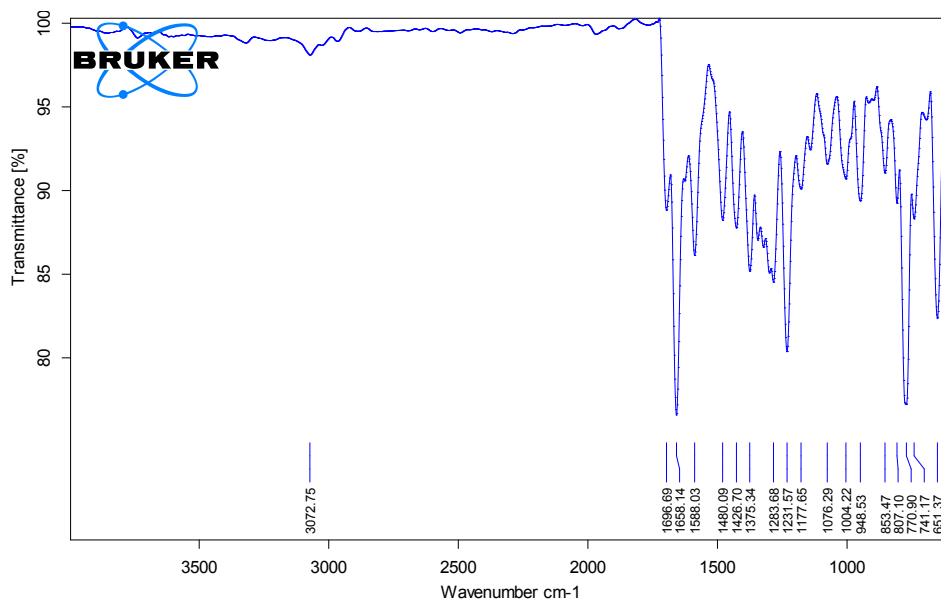

**Figure S10.** FTIR Spectrum of complex C2



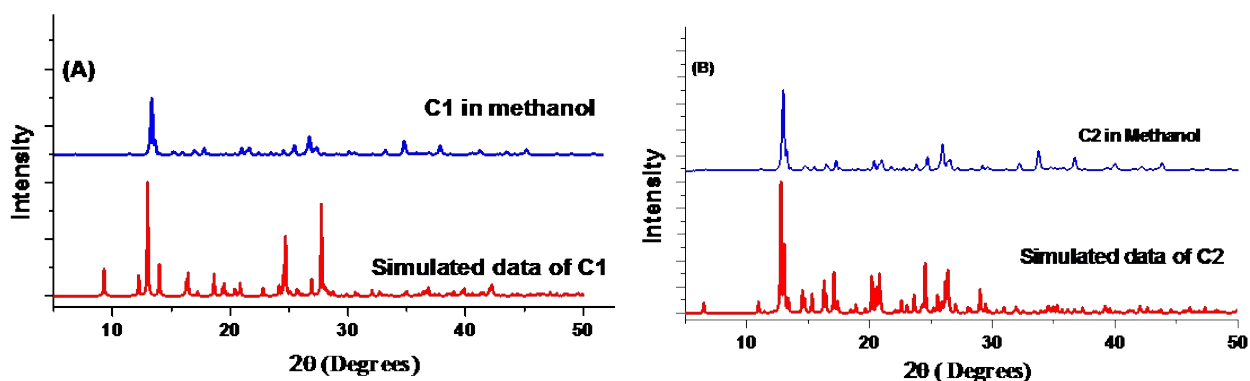

Figure S11 (A): The powder XRD pattern of C1 (simulated from single crystal data and synthesized in bulk), (B) The powder XRD pattern of C2 (simulated from single crystal data and synthesized in bulk).

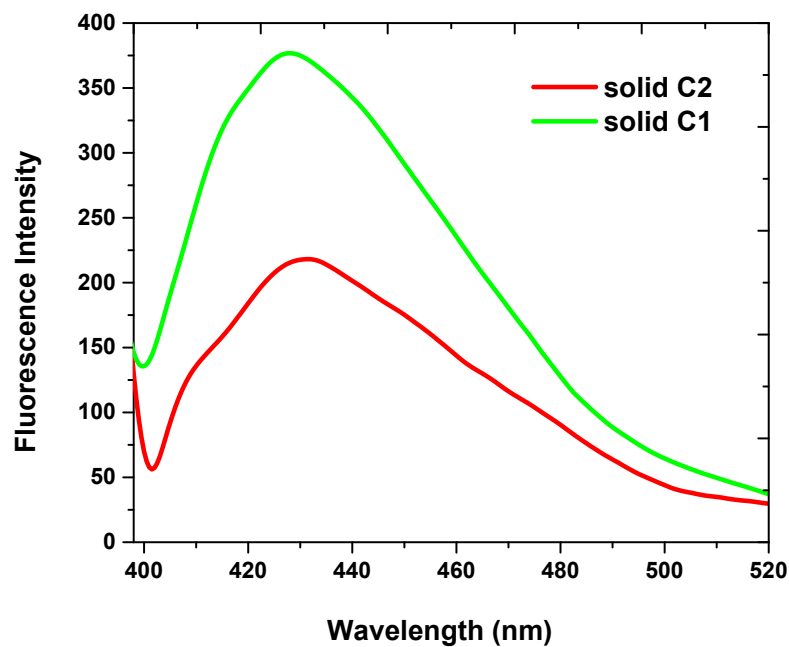

Figure S12: The solid state emission spectrum of C1 and C2 (bulk synthesis).

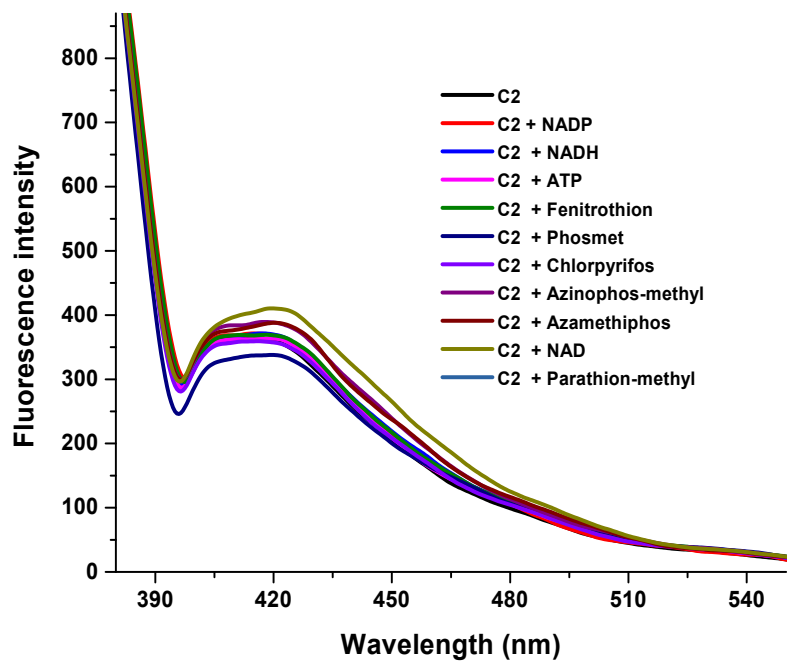

Figure S13. The emission spectrum of C2 (10  $\mu\text{M}$ ) in presence of tasted organophosphate (30  $\mu\text{M}$ )

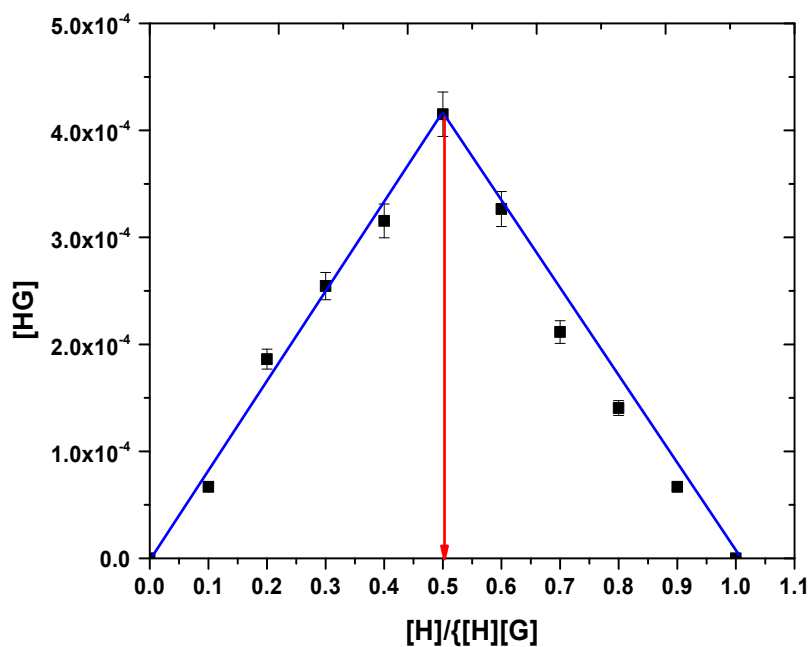

Figure S14. Jobs plot of C1 in presence of azamethiphos.

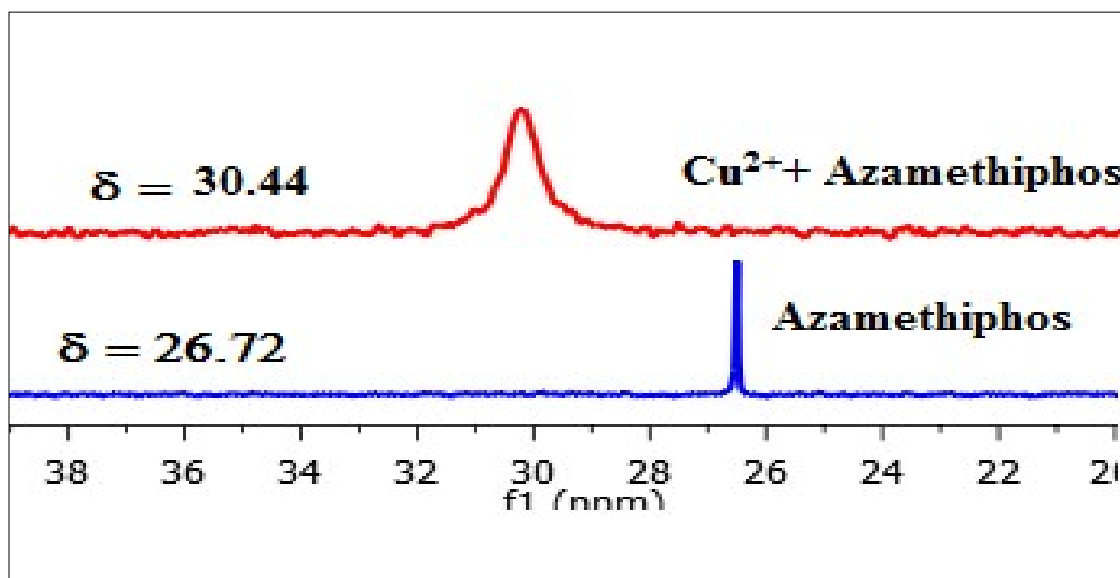

Figure S15. <sup>31</sup>P NMR spectrum of Azamethiphos and copper complex of Azamethiphos in DMSO-d<sub>6</sub>

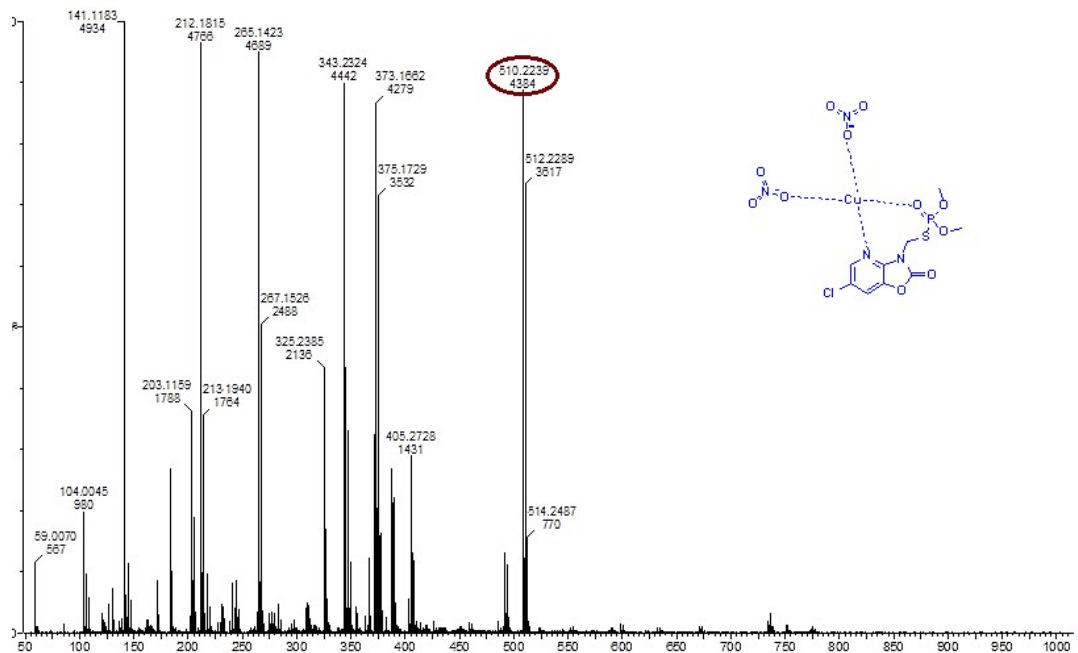

Figure S16. The ESI-Mass spectrum of copper: azamethiphos complex

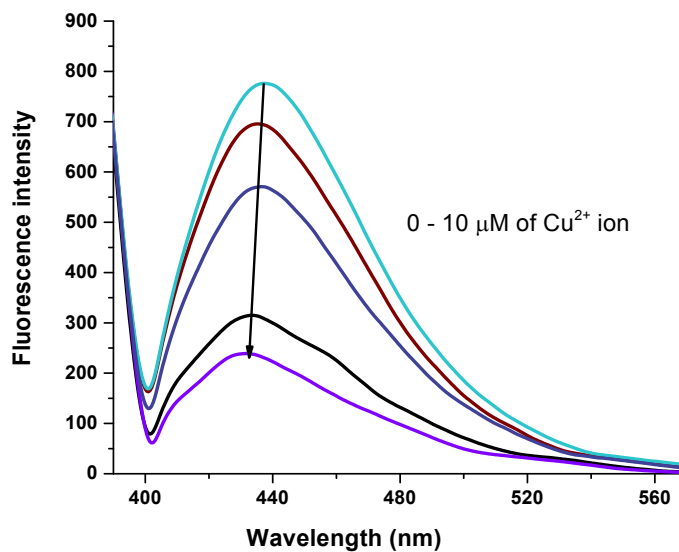

Figure S 17. The change in the emission spectrum on addition of  $\text{Cu}^{2+}$  ion (0-10  $\mu\text{M}$ ) in C1: azamethiphos (10:30  $\mu\text{M}$ ).

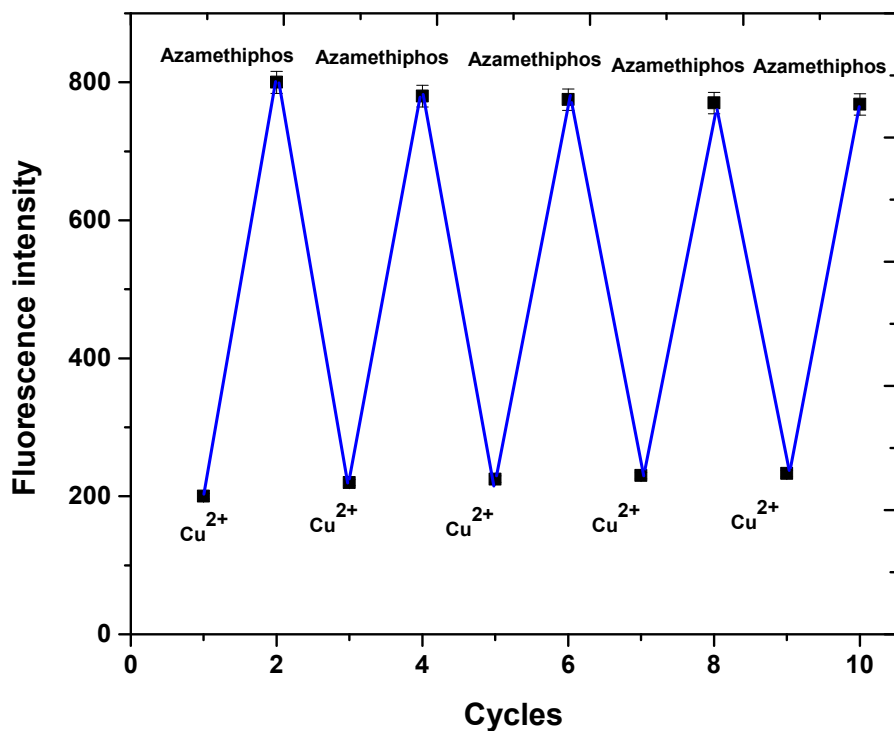

Figure S18. Reversible switching cycles of fluorescence intensity ( $\lambda_{em} = 430$  nm) by alternate addition of azamethiphos and copper ion

**Table S1. Selected bond lengths and angles ( $\text{\AA}$ , $^\circ$ ) for C1**

| Bond lengths( $\text{\AA}$ ) |            |                   |          |                     |          |
|------------------------------|------------|-------------------|----------|---------------------|----------|
| Cu(1)-N(2)                   | 1.9814(18) | O(1)-C(1)         | 1.211(3) | O(4)-N(3)           | 1.246(3) |
| Cu(1)-O(2)                   | 2.1307(15) | O(2)-C(12)        | 1.231(2) | O(5)-N(3)           | 1.220(2) |
| Cu(1)-O(3)                   | 2.1632(17) | O(3)-N(3)         | 1.273(2) | N(1)-C(12)          | 1.387(3) |
| Bond angles( $^\circ$ )      |            |                   |          |                     |          |
| N(2)#1-Cu(1)-N(2)            | 180.0      | O(2)-Cu(1)-O(2)#1 | 180.0    | N(2)#1-Cu(1)-O(3)#1 | 96.38(8) |
| N(2)#1-Cu(1)-O(2)            | 99.70(6)   | N(2)#1-Cu(1)-O(3) | 83.62(8) | N(2)-Cu(1)-O(3)#1   | 83.62(8) |
| N(2)-Cu(1)-O(2)              | 80.30(6)   | N(2)-Cu(1)-O(3)   | 96.38(8) | O(2)-Cu(1)-O(3)#1   | 81.45(6) |
| N(2)#1-Cu(1)-O(2)#1          | 80.30(6)   | O(2)-Cu(1)-O(3)   | 98.55(6) | O(2)#1-Cu(1)-O(3)#1 | 98.55(6) |
| N(2)-Cu(1)-O(2)#1            | 99.70(6)   | O(2)#1-Cu(1)-O(3) | 81.45(6) | O(3)-Cu(1)-O(3)#1   | 180.0    |

**Table S2. Hydrogen bonding parameters (Å, °) of C1**

| <b>D-H...A</b>                    | <b>D...A/ Å</b> | <b>H...A/ Å</b> | <b>D-H...A/°</b> |
|-----------------------------------|-----------------|-----------------|------------------|
| <b>N2-H1A...O1</b> <sup>i</sup>   | <b>2.983(2)</b> | <b>2.178(3)</b> | <b>172.4(2)</b>  |
| <b>N2-H1B...O4</b> <sup>ii</sup>  | <b>2.866(3)</b> | <b>2.033(3)</b> | <b>164.9(3)</b>  |
| <b>C4-H4A...O5</b> <sup>iii</sup> | <b>3.251(3)</b> | <b>2.675(2)</b> | <b>120.7(2)</b>  |

**Equivalent positions: (i) -x,-y+1,-z+1, (ii) -x+1,-y,-z+1, (iii) -x+1,-y+1,-z, (iv) x,+y+1,+z-1,**

**Table S3. Selected bond lengths and angles (Å,°) for C2**

| <b>Bond lengths(Å)</b> |            |                   |            |                     |            |
|------------------------|------------|-------------------|------------|---------------------|------------|
| Cu(1)-N(1)             | 1.9819(17) | Cu(1)-O(3)#1      | 1.9930(16) | N(1)-C(1)           | 1.338(3)   |
| Cu(1)-N(1)#1           | 1.9819(17) | Cu(1)-O(5)        | 2.423(2)   | N(1)-C(5)           | 1.339(3)   |
| Cu(1)-O(3)             | 1.9930(16) | Cu(1)-O(5)#1      | 2.423(2)   | N(2)-C(18)          | 1.395(3)   |
| <b>Bond angles(°)</b>  |            |                   |            |                     |            |
| N(1)-Cu(1)-N(1)#1      | 91.50(10)  | O(3)-Cu(1)-O(3)#1 | 90.53(10)  | N(1)-Cu(1)-O(5)#1   | 104.15(7)  |
| N(1)-Cu(1)-O(3)        | 92.22(7)   | N(1)-Cu(1)-O(5)   | 107.83(8)  | N(1)#1-Cu(1)-O(5)#1 | 107.83(8)  |
| N(1)#1-Cu(1)-O(3)      | 160.65(7)  | N(1)#1-Cu(1)-O(5) | 104.15(7)  | O(3)-Cu(1)-O(5)#1   | 89.63(8)   |
| N(1)-Cu(1)-O(3)#1      | 160.65(7)  | O(3)-Cu(1)-O(5)   | 56.71(7)   | O(3)#1-Cu(1)-O(5)#1 | 56.71(7)   |
| N(1)#1-Cu(1)-O(3)#1    | 92.22(7)   | O(3)#1-Cu(1)-O(5) | 89.63(8)   | O(5)-Cu(1)-O(5)#1   | 133.53(11) |

**Table S4. Hydrogen bonding parameters (Å, °) of C2**

| <b>D-H...A</b>                   | <b>D...A/ Å</b> | <b>H...A/ Å</b> | <b>D-H...A/°</b> |
|----------------------------------|-----------------|-----------------|------------------|
| <b>C1-H1...O4</b> <sup>i</sup>   | <b>3.172(3)</b> | <b>2.571(3)</b> | <b>121.4(1)</b>  |
| <b>C2-H2...O1</b>                | <b>3.207(3)</b> | <b>2.576(2)</b> | <b>124.2(1)</b>  |
| <b>C5-H5 ...O1</b> <sup>ii</sup> | <b>3.273(3)</b> | <b>2.437(2)</b> | <b>146.7(1)</b>  |

**Equivalent positions: (i) -x+1,-y+1,-z+1, (ii)x,-y,+z-1/2**

**Reference: (S)**

1. A. Altomare, M. C. Burla, M. Camalli, G. L. Cascarano, C. Giacovazzo, A. Guagliardi, G. G.

Moliterni, G. Polidori, R. Spagna, J. Appl. Crystallogr. 1999, 32, 115-119.

2. G. M. Sheldrick, *Acta Crystallogr. A* 71 (2015) 3-8.
3. L.J. Farrugia, *J. Appl. Crystallogr.* 32, 1999, 837.
4. M. Nardelli, *J. Appl. Crystallogr.* 28, 1995, 659.
5. W. T. Pennington, DIAMOND - Visual Crystal Structure Information System, *J. Appl. Cryst.* 32, 1999, 1028.

**Table S5. Comparisons table between literatures reported sensors and present sensor of organophosphate.**

| S.NO | Material used                    | Technique used for sensing | Detection limit | Solvent System           | Reference No.      |
|------|----------------------------------|----------------------------|-----------------|--------------------------|--------------------|
| 1    | Zirconium nanoparticles          | electrochemical            | 9 ng/ml         | Water                    | 1                  |
| 2    | Organic receptor                 | Fluorescence               | Not given       | dichloromethane          | 2                  |
| 3    | Lysine modified carbon nanotubes | electrochemical            | Microlevel      | Ethanol/water            | 3                  |
| 4    | Metal complexes                  | Fluorescence               | 44 – 71 nM      | Water                    | 4                  |
| 5    | Organic receptor                 | NMR spectroscopy           | Not given       | DMSO-d6                  | 5                  |
| 6    | Metal complex                    | Fluorescence               | Not given       | Chloroform: methanol     | 6                  |
| 7    | Organic receptor                 | Fluorescence               | Not given       | Methanol                 | 7                  |
| 8    | Metal complexes                  | Fluorescence               | Not given       | Chloroform: acetonitrile | 8                  |
| 9    | Metal complexes                  | Fluorescence               | 19 nM           | Methanol                 | Present manuscript |

#### References:

- 1 G. Liu and Y. Lin, 2005, **77**, 5894–5901.
- 2 S.-W. Zhang and T. M. Swager, *J. Am. Chem. Soc.*, 2003, **125**, 3420–3421.
- 3 P. M. Diakowski, Y. Xiao, M. W. P. Petryk and H.-B. Kraatz, *Anal. Chem.*, 2010, **82**, 3191–3197.
- 4 P. Raj, A. Singh, K. Kaur, T. Aree, A. Singh and N. Singh, *Inorg. Chem.*, 2016.
- 5 M. R. Sambrook, J. R. Hiscock, A. Cook, A. C. Green, I. Holden, J. C. Vincent and P. A.

- Gale, *Chem. Commun.*, 2012, **48**, 5605–5607.
- 6 S. Sarkar and R. Shunmugam, *Chem. Commun.*, 2014, **50**, 8511–8513.
- 7 T. J. Dale and J. Rebek, *J. Am. Chem. Soc.*, 2006, **128**, 4500–4501.
- 8 D. Knapton, M. Burnworth, S. J. Rowan and C. Weder, *Angew. Chemie*, 2006, **118**, 5957–5961.
